# Supplementary material for: Modulating the water channel AQP4 alters miRNA expression, astrocyte connectivity and water diffusion in the rodent brain
Source: PubMed Central journal article supplement (PMC5843607; doi:10.1038/s41598-018-22268-y), 2018-03-08
Supplement: 41598_2018_22268_MOESM1_ESM.pdf [file 41598_2018_22268_MOESM1_ESM.pdf]

**Modulating the water channel AQP4 alters miRNA expression, astrocyte connectivity and water diffusion in the rodent brain**

Amandine Jullienne<sup>1,2#</sup>, Andrew M Fukuda<sup>1,2#</sup>, Aleksandra Ichkova<sup>3</sup>, Nina Nishiyama<sup>2</sup>, Justine Aussudre<sup>3</sup>, André Obenaus<sup>1,4</sup>, Jérôme Badaut<sup>1,2,3\*</sup>

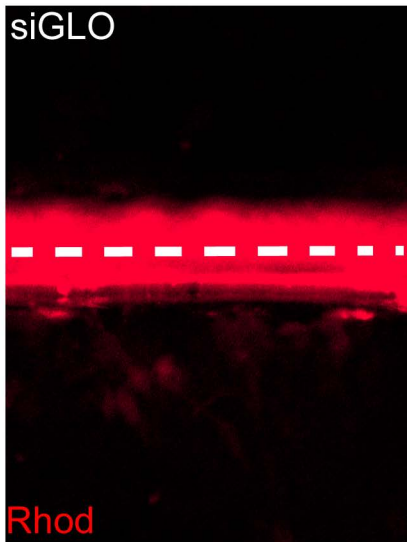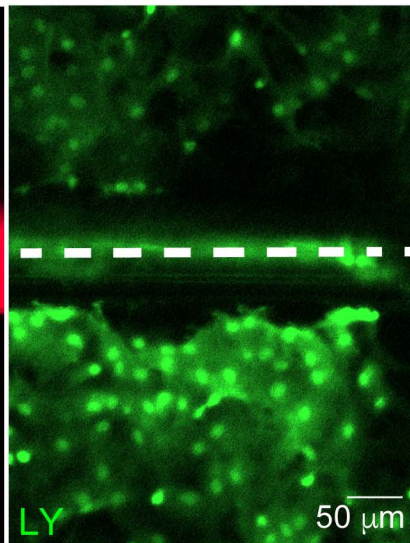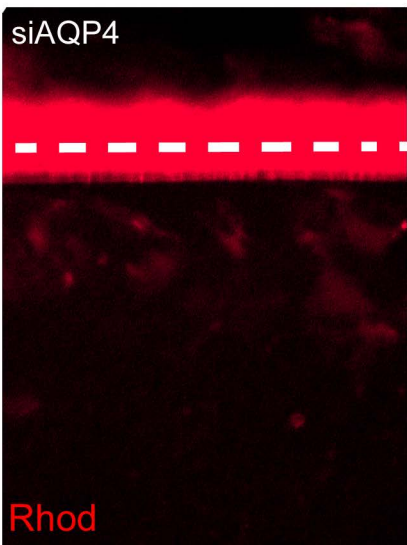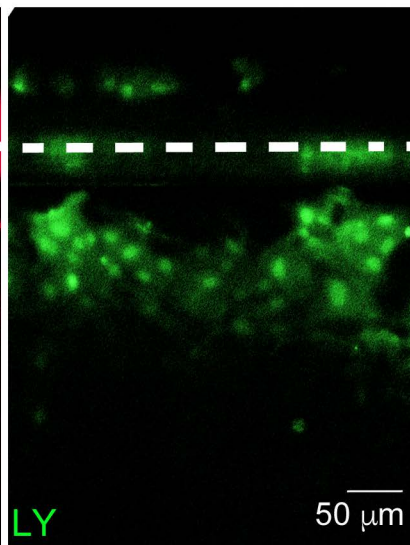

**Supplementary Figure 5:** “Scrape loading experiments (white dotted line) on astrocyte cultures revealed the effect of siAQP4 on astrocyte connectivity. Lucifer yellow (LY) spreading was decreased in the siAQP4-transfected astrocytes. Rhodamine B-Dextran (rhod) loading was similar and did not diffuse at distance from the site of scrape loading in both conditions. Scale bars: 50  $\mu$ m

siGLO

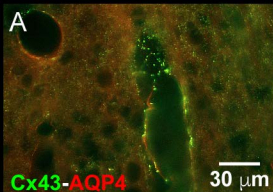

siCx43

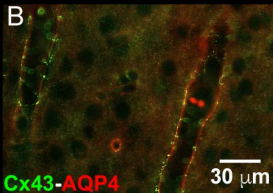

**Supplementary Figure 6. Effects of siCx43 on AQP4 and Cx43 expression.**

Double immunolabeling of AQP4 (red) and Cx43 (green) after intracortical injection of siGLO (A) and siCx43 (B) showed a decreased of Cx43 staining (green) and no major change in AQP4 expression (red). Scale bars: 30 $\mu$ m.

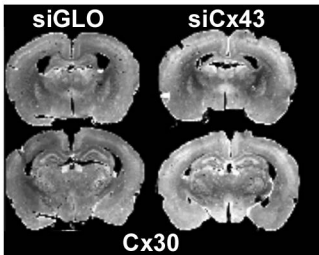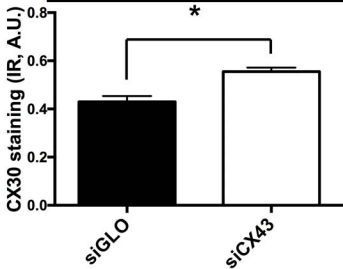

**Supplementary Figure 7. Effects of siCx43 on Cx30 expression.**

Intracortical injection of siCx43 induced an increased expression of Cx30 as shown by infra-red immunohistochemistry (top of the figure) and on the quantification.
